# Supplementary material for: Initial Decline (Dip) in Estimated Glomerular Filtration Rate After Initiation of Dapagliflozin in Patients With Heart Failure and Reduced Ejection Fraction: Insights From DAPA-HF
Source: PubMed Central journal article supplement — Circulation. 2022 Apr 20;146(6):438–49. doi: 10.1161/CIRCULATIONAHA.121.058910 (PMC9354593; doi:10.1161/circulationaha.121.058910), 2022-04-20

**SUPPLEMENTAL MATERIAL**

Initial decline (“dip”) in estimated glomerular filtration rate following initiation of dapagliflozin in patients with heart failure and reduced ejection fraction: Insights from DAPA-HF.

Tables S1-S4

Figures S1-S4

**Supplementary Table 1: Change in eGFR at 14 days by baseline eGFR**

|                                                         | eGFR $\geq 75$      |                     | eGFR $< 75 - \geq 60$ |                     | eGFR $< 60 - \geq 45$ |                     | eGFR $< 45$         |                     |
|---------------------------------------------------------|---------------------|---------------------|-----------------------|---------------------|-----------------------|---------------------|---------------------|---------------------|
|                                                         | Placebo             | Dapagliflozin       | Placebo               | Dapagliflozin       | Placebo               | Dapagliflozin       | Placebo             | Dapagliflozin       |
| <b>Overall mean change</b>                              |                     |                     |                       |                     |                       |                     |                     |                     |
| Mean change in eGFR (95%CI) - ml/min/1.73m <sup>2</sup> | -2.3<br>(-3.0,-1.5) | -5.0<br>(-5.7,-4.3) | -0.9<br>(-1.7,-0.1)   | -4.6<br>(-5.4,-3.8) | -0.2<br>(-0.9,0.5)    | -3.7<br>(-4.4,-3.0) | -0.5<br>(-1.3,0.3)  | -2.9<br>(-3.7,-2.1) |
| Between treatment difference (95% CI)                   | -2.7 (-3.8, -1.7)   |                     | -3.7 (-4.8,-2.5)      |                     | -3.5 (-4.5,-2.5)      |                     | -2.4 (-3.5,-1.3)    |                     |
| <b>Overall percentage change</b>                        |                     |                     |                       |                     |                       |                     |                     |                     |
| Mean change in eGFR (95% CI) - %                        | -2.6<br>(-3.4,-1.7) | -5.7<br>(-6.5,-4.8) | -1.4<br>(-2.6,-0.2)   | -6.9<br>(-8.1,-5.7) | -0.5<br>(-1.8, 0.9)   | -7.2<br>(-8.6,-5.8) | -1.2<br>(-3.4, 0.9) | -7.5<br>(-9.6,-5.4) |
| Between treatment difference (95% CI)                   | -3.1 (-4.3,-1.9)    |                     | -5.5 (-7.2,-3.8)      |                     | -6.7 (-8.7,-4.8)      |                     | -6.3 (-9.3,-3.3)    |                     |
| <b><math>\geq 5</math>ml/min decrease in eGFR</b>       |                     |                     |                       |                     |                       |                     |                     |                     |
| Number with decrease (%)                                | 227/725<br>(31.3)   | 357/767<br>(46.5)   | 212/648<br>(32.7)     | 320/601<br>(53.2)   | 143/586<br>(24.4)     | 280/591<br>(47.4)   | 77/350<br>(22.0)    | 127/350<br>(36.3)   |

|                                                         |                |                |               |                |               |                |               |              |
|---------------------------------------------------------|----------------|----------------|---------------|----------------|---------------|----------------|---------------|--------------|
| OR for decrease with dapagliflozin over placebo (95%CI) | 1.9 (1.6-2.4)  |                | 2.3 (1.9-3.0) |                | 2.8 (2.2-3.6) |                | 2.0 (1.5-2.8) |              |
| <b>≥ 10 ml/min decrease in eGFR</b>                     |                |                |               |                |               |                |               |              |
| Number with decrease (%)                                | 124/725 (17.1) | 213/767 (27.8) | 92/648 (14.2) | 160/601 (26.6) | 46/586 (7.9)  | 119/591 (20.1) | 19/350 (5.4)  | 31/350 (8.9) |
| OR for decrease with dapagliflozin over placebo (95%CI) | 1.9 (1.5-2.4)  |                | 2.2 (1.7-2.9) |                | 3.0 (2.1-4.3) |                | 1.7 (0.9-3.1) |              |

CI, confidence interval; eGFR, estimated glomerular filtration rate; OR, odds ratio; WRF, worsening renal function

**Supplementary Table 2a.** Baseline characteristics according to extent of initial eGFR decline (“dip”) – all patients.

|                                   | <b>No decline</b> | <b>Up to 10% decline</b> | <b>&gt;10% decline</b> | <b>p-value (trend)</b> |
|-----------------------------------|-------------------|--------------------------|------------------------|------------------------|
|                                   | <b>N=1,797</b>    | <b>N=1,455</b>           | <b>N=1,366</b>         |                        |
| Age                               | 65.5±11.1         | 66.2±10.9                | 67.6±10.5              | <0.001                 |
| Sex                               |                   |                          |                        | 0.03                   |
| Female                            | 408 (22.7)        | 305 (21.0)               | 360 (26.4)             |                        |
| Male                              | 1,389 (77.3)      | 1,150 (79.0)             | 1,006 (73.6)           |                        |
| Race                              |                   |                          |                        | 0.002                  |
| Asian                             | 424 (23.6)        | 365 (25.1)               | 291 (21.3)             |                        |
| Black                             | 77 ( 4.3)         | 66 ( 4.5)                | 78 ( 5.7)              |                        |
| Other                             | 13 ( 0.7)         | 28 ( 1.9)                | 27 ( 2.0)              |                        |
| White                             | 1,283 (71.4)      | 996 (68.5)               | 970 (71.0)             |                        |
| Region                            |                   |                          |                        | <0.001                 |
| Asia/Pacific                      | 419 (23.3)        | 359 (24.7)               | 284 (20.8)             |                        |
| Europe                            | 865 (48.1)        | 641 (44.1)               | 592 (43.3)             |                        |
| North America                     | 224 (12.5)        | 230 (15.8)               | 204 (14.9)             |                        |
| South America                     | 289 (16.1)        | 225 (15.5)               | 286 (20.9)             |                        |
| NYHA class                        |                   |                          |                        | 0.91                   |
| II                                | 1,210 (67.3)      | 1,015 (69.8)             | 913 (66.8)             |                        |
| III                               | 571 (31.8)        | 429 (29.5)               | 438 (32.1)             |                        |
| IV                                | 16 ( 0.9)         | 11 ( 0.8)                | 15 ( 1.1)              |                        |
| KCCQ-TSS                          | 78.1 (60.4-91.7)  | 79.2 (60.4-92.7)         | 76.0 (56.2-91.7)       | 0.15                   |
| Pulse (bpm)                       | 71.8±11.8         | 71.1±11.4                | 71.5±11.9              | 0.25                   |
| Systolic BP (mmHg)                | 121.3±15.6        | 122.0±16.6               | 122.7±16.9             | 0.06                   |
| LVEF (%)                          | 31.1±6.8          | 30.9±6.9                 | 31.3±6.6               | 0.54                   |
| Main etiology of HF               |                   |                          |                        | 0.23                   |
| Ischemic                          | 1,038 (57.8)      | 793 (54.5)               | 766 (56.1)             |                        |
| Non-ischemic                      | 617 (34.3)        | 551 (37.9)               | 481 (35.2)             |                        |
| Unknown                           | 142 ( 7.9)        | 111 ( 7.6)               | 119 ( 8.7)             |                        |
| Prior HF hospitalization          | 868 (48.3)        | 666 (45.8)               | 663 (48.5)             | 0.99                   |
| Time from diagnosis of HF         |                   |                          |                        | 0.027                  |
| 0 - 3 months                      | 58 ( 3.2)         | 51 ( 3.5)                | 35 ( 2.6)              |                        |
| >3 - 6 months                     | 171 ( 9.5)        | 107 ( 7.4)               | 106 ( 7.8)             |                        |
| >6 - 12 months                    | 227 (12.6)        | 167 (11.5)               | 148 (10.8)             |                        |
| >1 - 2 years                      | 277 (15.4)        | 195 (13.4)               | 198 (14.5)             |                        |
| >2 - 5 years                      | 415 (23.1)        | 325 (22.3)               | 325 (23.8)             |                        |
| >5 years                          | 649 (36.1)        | 610 (41.9)               | 554 (40.6)             |                        |
| Time from last HF hospitalization |                   |                          |                        | 0.89                   |
| 0 - 3 months                      | 139 (16.0)        | 119 (17.9)               | 98 (14.8)              |                        |

|                                      |                       |                       |                       |       |
|--------------------------------------|-----------------------|-----------------------|-----------------------|-------|
| >3 - 6 months                        | 161 (18.5)            | 118 (17.7)            | 120 (18.1)            |       |
| >6 - 12 months                       | 212 (24.4)            | 142 (21.3)            | 158 (23.8)            |       |
| >1 - 2 years                         | 129 (14.9)            | 106 (15.9)            | 107 (16.1)            |       |
| >2 - 5 years                         | 130 (15.0)            | 99 (14.9)             | 97 (14.6)             |       |
| >5 years                             | 97 (11.2)             | 82 (12.3)             | 83 (12.5)             |       |
| NT-proBNP (pg/ml)                    | 1376.1 (829.3-2485.1) | 1431.4 (841.7-2620.6) | 1520.7 (897.0-2752.8) | 0.01  |
| eGFR (mL/min/1.73 m <sup>2</sup> )   | 65.8±19.2             | 68.4±20.6             | 63.0±18.0             | 0.001 |
| Baseline HbA1c (%)                   | 6.5±1.4               | 6.4±1.3               | 6.6±1.4               | 0.08  |
| Body Mass Index (kg/m <sup>2</sup> ) | 28.1±5.9              | 27.9±5.7              | 28.5±6.2              | 0.15  |
| Hypertension                         | 1,322 (73.6)          | 1,058 (72.7)          | 1,054 (77.2)          | 0.03  |
| Prior MI                             | 800 (44.5)            | 654 (44.9)            | 578 (42.3)            | 0.24  |
| Atrial fibrillation                  | 694 (38.6)            | 546 (37.5)            | 535 (39.2)            | 0.81  |
| History of TIIDM                     | 738 (41.1)            | 584 (40.1)            | 607 (44.4)            | 0.08  |
| TIIDM by history / HbA1c             | 785 (43.7)            | 623 (42.8)            | 668 (48.9)            | 0.01  |
| Device therapy                       |                       |                       |                       |       |
| ICD                                  | 451 (25.1)            | 386 (26.5)            | 376 (27.5)            | 0.12  |
| CRT                                  | 137 ( 7.6)            | 94 ( 6.5)             | 115 ( 8.4)            | 0.48  |
| Heart failure medication             |                       |                       |                       |       |
| ACEI or ARB                          | 1,519 (84.5)          | 1,206 (82.9)          | 1,121 (82.1)          | 0.06  |
| ARNI                                 | 172 ( 9.6)            | 152 (10.4)            | 167 (12.2)            | 0.02  |
| ACEI/ARB/ARNI                        | 1,686 (93.8)          | 1,352 (92.9)          | 1,283 (93.9)          | 0.98  |
| Beta blocker                         | 1,718 (95.6)          | 1,408 (96.8)          | 1,313 (96.1)          | 0.39  |
| MRA                                  | 1,289 (71.7)          | 1,020 (70.1)          | 967 (70.8)            | 0.52  |
| Digoxin                              | 351 (19.5)            | 260 (17.9)            | 248 (18.2)            | 0.29  |
| Diuretic                             | 1,529 (85.1)          | 1,184 (81.4)          | 1,190 (87.1)          | 0.21  |

**Supplementary Table 2b.** Baseline characteristics according to extent of initial eGFR decline (“dip”) in placebo and dapagliflozin groups separately.

|                           | PLACEBO               |                            |                       | DAPAGLIFLOZIN       |                            |                       |
|---------------------------|-----------------------|----------------------------|-----------------------|---------------------|----------------------------|-----------------------|
|                           | No decline<br>N=1,091 | Up to 10% decline<br>N=734 | >10% decline<br>N=484 | No decline<br>N=706 | Up to 10% decline<br>N=721 | >10% decline<br>N=882 |
| Age                       | 65.7±11.2             | 67.0±10.5                  | 67.3±10.2             | 65.2±10.8           | 65.3±11.2                  | 67.8±10.7             |
| Sex                       |                       |                            |                       |                     |                            |                       |
| Female                    | 229 (21.0)            | 157 (21.4)                 | 139 (28.7)            | 179 (25.4)          | 148 (20.5)                 | 221 (25.1)            |
| Male                      | 862 (79.0)            | 577 (78.6)                 | 345 (71.3)            | 527 (74.6)          | 573 (79.5)                 | 661 (74.9)            |
| Race                      |                       |                            |                       |                     |                            |                       |
| Asian                     | 251 (23.0)            | 192 (26.2)                 | 110 (22.7)            | 173 (24.5)          | 173 (24.0)                 | 181 (20.5)            |
| Black                     | 40 (3.7)              | 34 (4.6)                   | 28 (5.8)              | 37 (5.2)            | 32 (4.4)                   | 50 (5.7)              |
| Other                     | 9 (0.8)               | 11 (1.5)                   | 11 (2.3)              | 4 (0.6)             | 17 (2.4)                   | 16 (1.8)              |
| White                     | 791 (72.5)            | 497 (67.7)                 | 335 (69.2)            | 492 (69.7)          | 499 (69.2)                 | 635 (72.0)            |
| Region                    |                       |                            |                       |                     |                            |                       |
| Asia/Pacific              | 248 (22.7)            | 189 (25.7)                 | 106 (21.9)            | 171 (24.2)          | 170 (23.6)                 | 178 (20.2)            |
| Europe                    | 525 (48.1)            | 306 (41.7)                 | 195 (40.3)            | 340 (48.2)          | 335 (46.5)                 | 397 (45.0)            |
| North America             | 138 (12.6)            | 124 (16.9)                 | 69 (14.3)             | 86 (12.2)           | 106 (14.7)                 | 135 (15.3)            |
| South America             | 180 (16.5)            | 115 (15.7)                 | 114 (23.6)            | 109 (15.4)          | 110 (15.3)                 | 172 (19.5)            |
| NYHA class at enrolment   |                       |                            |                       |                     |                            |                       |
| II                        | 727 (66.6)            | 511 (69.6)                 | 327 (67.6)            | 483 (68.4)          | 504 (69.9)                 | 586 (66.4)            |
| III                       | 353 (32.4)            | 219 (29.8)                 | 149 (30.8)            | 218 (30.9)          | 210 (29.1)                 | 289 (32.8)            |
| IV                        | 11 (1.0)              | 4 (0.5)                    | 8 (1.7)               | 5 (0.7)             | 7 (1.0)                    | 7 (0.8)               |
| KCCQ-TSS                  | 79.2 (61.5-93.8)      | 79.2 (62.5-93.8)           | 75.0 (55.2-89.1)      | 78.1 (58.3-90.6)    | 79.2 (60.4-91.7)           | 77.1 (56.2-93.8)      |
| Pulse (bpm)               | 71.4±11.8             | 71.4±11.3                  | 72.0±12.4             | 72.3±11.8           | 70.8±11.5                  | 71.1±11.6             |
| Systolic BP (mmHg)        | 121.4±15.6            | 122.2±17.0                 | 121.2±17.0            | 121.1±15.6          | 121.7±16.3                 | 123.5±16.8            |
| LVEF (%)                  | 30.9±6.9              | 30.9±6.9                   | 30.7±6.8              | 31.2±6.7            | 30.9±6.8                   | 31.6±6.6              |
| Main etiology of HF       |                       |                            |                       |                     |                            |                       |
| Ischemic                  | 639 (58.6)            | 408 (55.6)                 | 271 (56.0)            | 399 (56.5)          | 385 (53.4)                 | 495 (56.1)            |
| Non-ischemic              | 366 (33.5)            | 269 (36.6)                 | 178 (36.8)            | 251 (35.6)          | 282 (39.1)                 | 303 (34.4)            |
| Unknown                   | 86 (7.9)              | 57 (7.8)                   | 35 (7.2)              | 56 (7.9)            | 54 (7.5)                   | 84 (9.5)              |
| Prior HF hospitalization  | 530 (48.6)            | 333 (45.4)                 | 231 (47.7)            | 338 (47.9)          | 333 (46.2)                 | 432 (49.0)            |
| Time from diagnosis of HF |                       |                            |                       |                     |                            |                       |
| 0 - 3 months              | 34 (3.1)              | 18 (2.5)                   | 13 (2.7)              | 24 (3.4)            | 33 (4.6)                   | 22 (2.5)              |
| >3 - 6 months             | 106 (9.7)             | 61 (8.3)                   | 43 (8.9)              | 65 (9.2)            | 46 (6.4)                   | 63 (7.1)              |
| >6 - 12 months            | 144 (13.2)            | 83 (11.3)                  | 54 (11.2)             | 83 (11.8)           | 84 (11.7)                  | 94 (10.7)             |

|                                      |                       |                       |                       |                       |                       |                       |
|--------------------------------------|-----------------------|-----------------------|-----------------------|-----------------------|-----------------------|-----------------------|
| >1 - 2 years                         | 174 (15.9)            | 98 (13.4)             | 84 (17.4)             | 103 (14.6)            | 97 (13.5)             | 114 (12.9)            |
| >2 - 5 years                         | 229 (21.0)            | 171 (23.3)            | 113 (23.3)            | 186 (26.3)            | 154 (21.4)            | 212 (24.0)            |
| >5 years                             | 404 (37.0)            | 303 (41.3)            | 177 (36.6)            | 245 (34.7)            | 307 (42.6)            | 377 (42.7)            |
| Time from last HF hosp.              |                       |                       |                       |                       |                       |                       |
| 0 - 3 months                         | 75 (14.2)             | 54 (16.2)             | 31 (13.4)             | 64 (18.9)             | 65 (19.5)             | 67 (15.5)             |
| >3 - 6 months                        | 100 (18.9)            | 65 (19.5)             | 49 (21.2)             | 61 (18.0)             | 53 (15.9)             | 71 (16.4)             |
| >6 - 12 months                       | 138 (26.0)            | 70 (21.0)             | 60 (26.0)             | 74 (21.9)             | 72 (21.6)             | 98 (22.7)             |
| >1 - 2 years                         | 80 (15.1)             | 49 (14.7)             | 36 (15.6)             | 49 (14.5)             | 57 (17.1)             | 71 (16.4)             |
| >2 - 5 years                         | 78 (14.7)             | 54 (16.2)             | 30 (13.0)             | 52 (15.4)             | 45 (13.5)             | 67 (15.5)             |
| >5 years                             | 59 (11.1)             | 41 (12.3)             | 25 (10.8)             | 38 (11.2)             | 41 (12.3)             | 58 (13.4)             |
| NT-proBNP (pg/ml)                    | 1360.2 (808.4-2430.1) | 1480.5 (866.1-2620.6) | 1587.1 (922.5-3045.1) | 1389.8 (856.0-2614.5) | 1385.1 (815.7-2603.1) | 1485.0 (891.6-2606.9) |
| eGFR (mL/min/1.73 m <sup>2</sup> )   | 65.4±19.1             | 67.3±20.2             | 63.7±18.1             | 66.6±19.3             | 69.5±20.9             | 62.6±17.9             |
| Baseline HbA1c (%)                   | 6.5±1.3               | 6.4±1.2               | 6.6±1.6               | 6.5±1.4               | 6.4±1.3               | 6.6±1.3               |
| Body Mass Index (kg/m <sup>2</sup> ) | 28.3±6.0              | 27.7±5.6              | 28.3±6.2              | 27.8±5.7              | 28.2±5.8              | 28.6±6.2              |
| Hypertension                         | 810 (74.2)            | 538 (73.3)            | 364 (75.2)            | 512 (72.5)            | 520 (72.1)            | 690 (78.2)            |
| Prior MI                             | 494 (45.3)            | 338 (46.0)            | 198 (40.9)            | 306 (43.3)            | 316 (43.8)            | 380 (43.1)            |
| AF                                   | 430 (39.4)            | 273 (37.2)            | 176 (36.4)            | 264 (37.4)            | 273 (37.9)            | 359 (40.7)            |
| History of TIIDM                     | 461 (42.3)            | 304 (41.4)            | 194 (40.1)            | 277 (39.2)            | 280 (38.8)            | 413 (46.8)            |
| TIIDM by history / HbA1c             | 489 (44.8)            | 323 (44.0)            | 216 (44.6)            | 296 (41.9)            | 300 (41.6)            | 452 (51.2)            |
| Device therapy                       |                       |                       |                       |                       |                       |                       |
| ICD                                  | 272 (24.9)            | 191 (26.0)            | 140 (28.9)            | 179 (25.4)            | 195 (27.0)            | 236 (26.8)            |
| CRT                                  | 72 ( 6.6)             | 49 ( 6.7)             | 37 ( 7.6)             | 65 ( 9.2)             | 45 ( 6.2)             | 78 ( 8.8)             |
| HF medications                       |                       |                       |                       |                       |                       |                       |
| ACEI or ARB                          | 921 (84.4)            | 592 (80.7)            | 385 (79.5)            | 598 (84.7)            | 614 (85.2)            | 736 (83.4)            |
| ARNI                                 | 105 ( 9.6)            | 81 (11.0)             | 66 (13.6)             | 67 ( 9.5)             | 71 ( 9.8)             | 101 (11.5)            |
| ACEI/ARB/ARNI                        | 1,023 (93.8)          | 672 (91.6)            | 451 (93.2)            | 663 (93.9)            | 680 (94.3)            | 832 (94.3)            |
| Beta blocker                         | 1,049 (96.2)          | 709 (96.6)            | 460 (95.0)            | 669 (94.8)            | 699 (96.9)            | 853 (96.7)            |
| MRA                                  | 785 (72.0)            | 495 (67.4)            | 350 (72.3)            | 504 (71.4)            | 525 (72.8)            | 617 (70.0)            |
| Digoxin                              | 218 (20.0)            | 122 (16.6)            | 88 (18.2)             | 133 (18.8)            | 138 (19.1)            | 160 (18.1)            |
| Diuretic                             | 926 (84.9)            | 601 (81.9)            | 426 (88.0)            | 603 (85.4)            | 583 (80.9)            | 764 (86.6)            |

Data are presented as means±SD or medians (IQR) for continuous measures, and n (%) for categorical measures.

ACEI, angiotensin-converting enzyme inhibitor; ARB, angiotensin receptor blocker; ARNI, angiotensin receptor–neprilysin inhibitor; BP, blood pressure; CRT, cardiac resynchronization therapy; eGFR, estimated glomerular filtration rate; HbA1c, glycated hemoglobin; HF, heart failure; ICD, implantable cardioverter-defibrillator; KCCQ-TSS, Kansas City Cardiomyopathy Questionnaire-total symptom

score; LVEF, left ventricular ejection fraction; MI, myocardial infarction; MRA, mineralocorticoid receptor antagonist; NT-proBNP, N-terminal pro B-type natriuretic peptide; T2DM, type 2 diabetes mellitus



**Supplementary Table 3.** Systolic blood pressure change at 14 days in subgroups of left ventricular ejection fraction

|                                      | LVEF <30%         |               | LVEF ≥30%         |               |
|--------------------------------------|-------------------|---------------|-------------------|---------------|
|                                      | Placebo           | Dapagliflozin | Placebo           | Dapagliflozin |
| Mean change in SBP at 14 days (± SD) | -0.1 ± 12.0       | -2.6 ± 11.7   | -0.1 ± 12.0       | -3.5 ± 12.8   |
| Between treatment group difference   | -1.6 (-2.5, -0.7) |               | -3.2 (-4.1, -2.3) |               |

Interaction p value (dichotomized LVEF and randomized treatment) = 0.02

LVEF, left ventricular ejection fraction; SBP, systolic blood pressure

**Supplementary Table 4A.** Number of patients permanently discontinuing treatment with renin-angiotensin-aldosterone-system antagonist (RAASi) during study follow up according to initial (14 day) change in eGFR.

|                                      | No decline in eGFR<br>N stopped / N total | Up to 10% decline in eGFR<br>N stopped / N total | >10% decline in eGFR<br>N stopped / N total | Any decline in eGFR<br>N stopped / N total |
|--------------------------------------|-------------------------------------------|--------------------------------------------------|---------------------------------------------|--------------------------------------------|
| Placebo<br>(n = 2309)                | 25/1091 (2.3%)                            | 32/734 (4.4%)                                    | 19/484 (3.9%)                               | 51/1218 (4.2%)                             |
| Dapagliflozin<br>(n = 2309)          | 21/706 (3.0%)                             | 17/721 (2.4%)                                    | 29/882 (3.3%)                               | 46/1603 (2.9%)                             |
| Difference between treatment groups* | P = 0.37                                  | P = 0.03                                         | P = 0.54                                    | P = 0.06                                   |

\* Difference between randomized treatment groups within each eGFR change category compared using a chi-square test

**Supplementary Table 4B.** Number of patients with stops in treatment with RAASi in each treatment arm, followed by the number of patients who restarted

|               | 1 <sup>st</sup> stop | Restarted | 2 <sup>nd</sup> stop | Restarted | 3 <sup>rd</sup> stop | Restarted | 4 <sup>th</sup> stop | Restarted | 5 <sup>th</sup> stop | Restarted |
|---------------|----------------------|-----------|----------------------|-----------|----------------------|-----------|----------------------|-----------|----------------------|-----------|
| Placebo       | 177                  | 100 (56%) | 30                   | 16 (53%)  | 5                    | 2 (40%)   | 1                    | 0         | 0                    | 0         |
| Dapagliflozin | 182                  | 109 (60%) | 29                   | 18 (62%)  | 8                    | 5 (63%)   | 3                    | 1 (33%)   | 1                    | 0         |

**Supplementary Figure 1:** Odds ratio for a >10% decline in eGFR with dapagliflozin compared with placebo between baseline and day 14 according to baseline eGFR

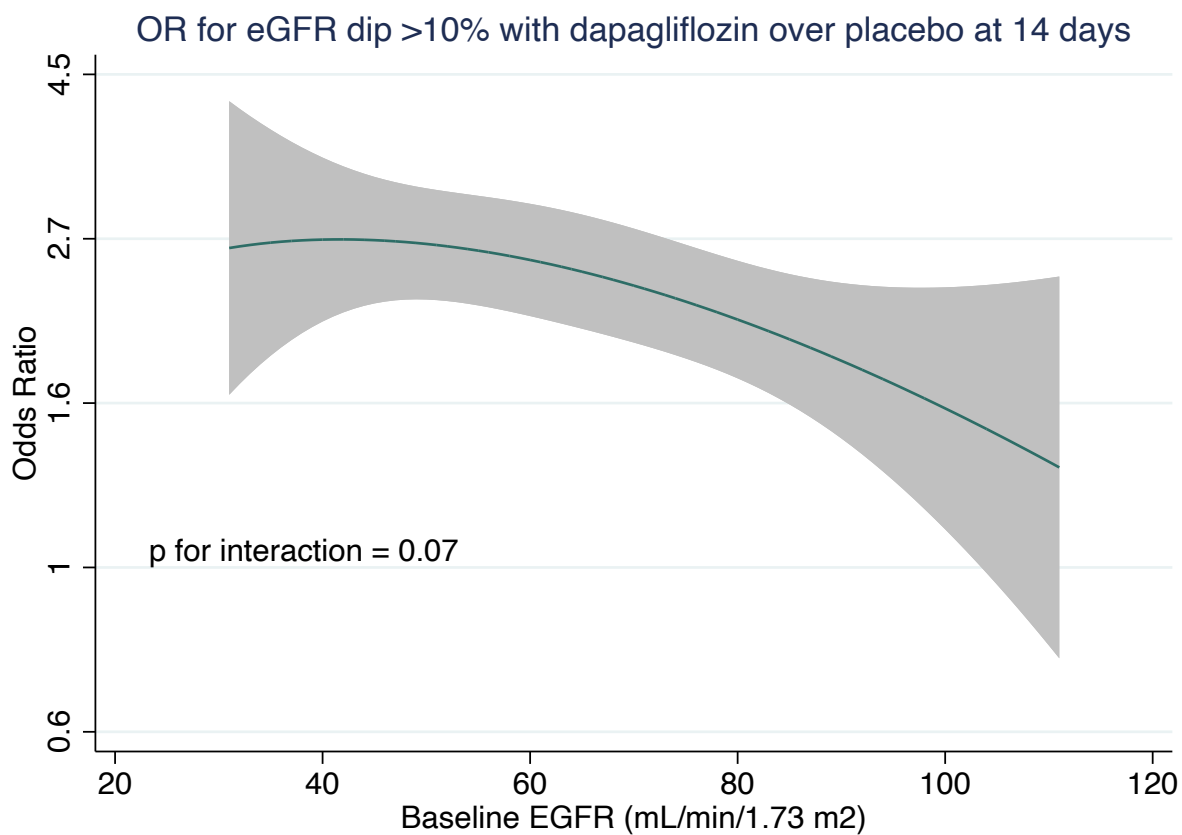

Fractional polynomial plot for odds ratio for occurrence of >10% decline in eGFR for dapagliflozin compared with placebo across the range of baseline eGFR

**Supplementary Figure 2:** Odds ratio for a >10% decline in eGFR between baseline and day 14 according to baseline eGFR in all patients

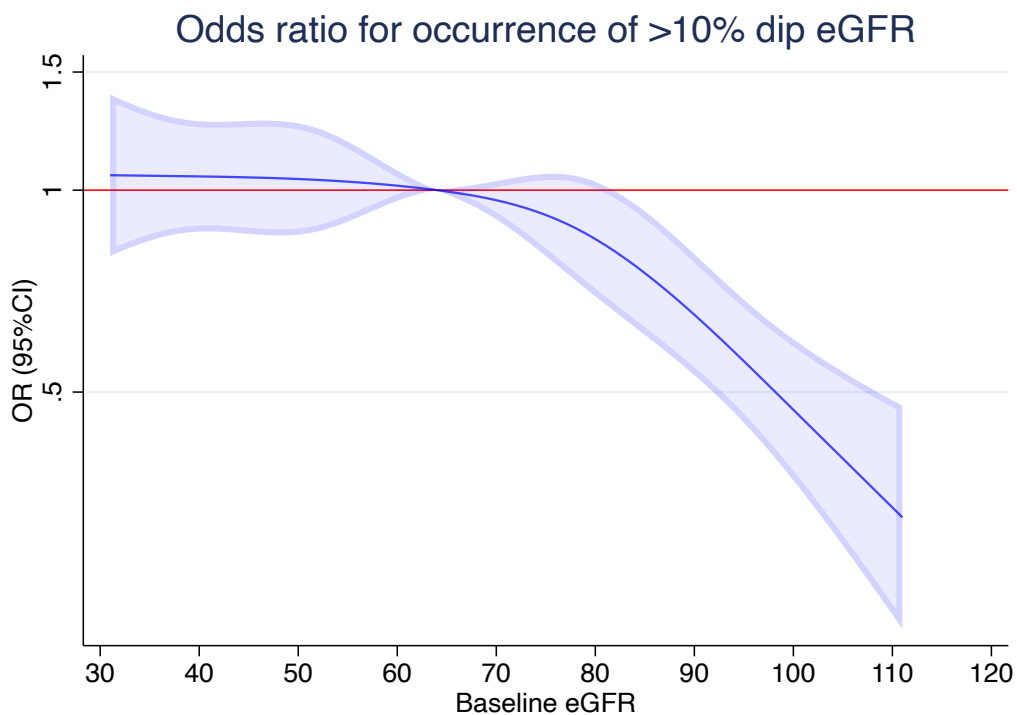

Odds ratio for occurrence of eGFR dip across baseline eGFR modelled using a restricted cubic spline including patients in both randomized treatment groups (unadjusted)

**Supplementary Figure 3.** Odds ratio for an early decline (“dip”) of >10% vs ≤10% decline/no change/improvement in eGFR for patients on dapagliflozin compared with placebo.

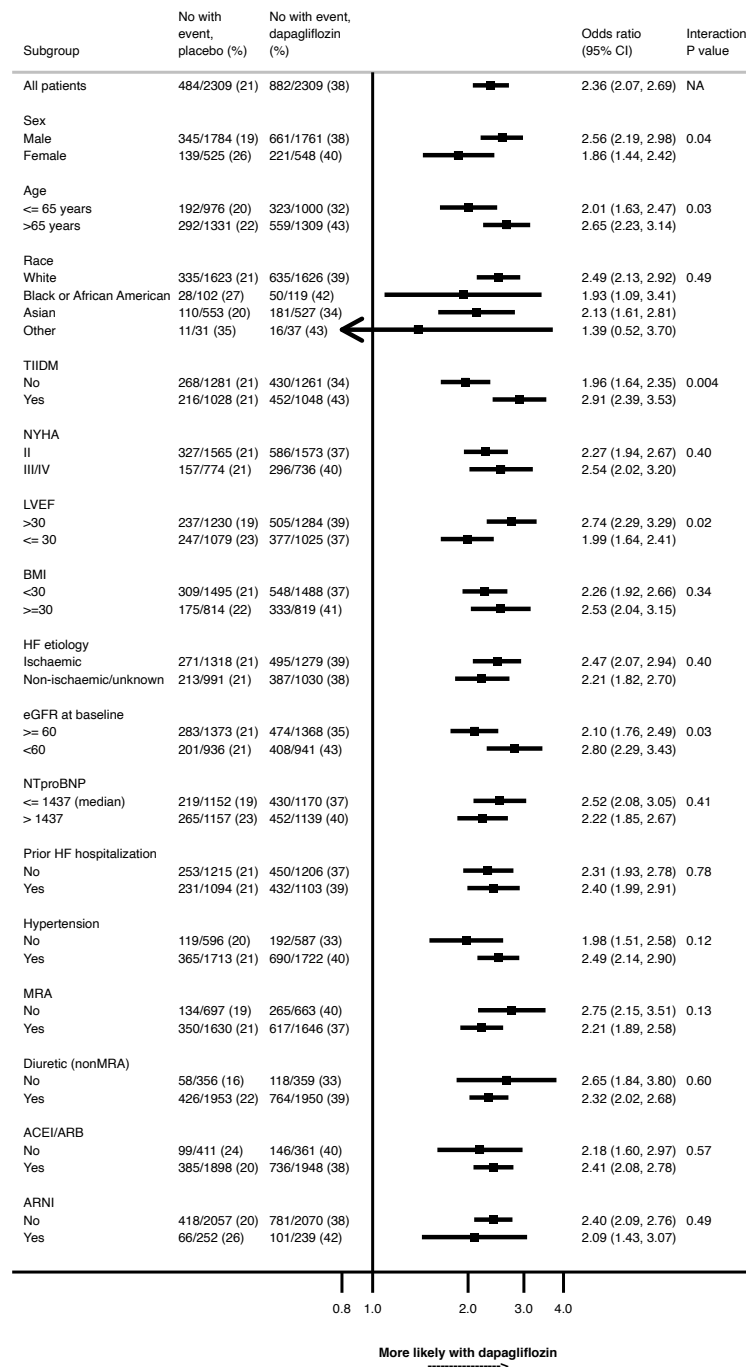

ACEI, angiotensin-converting enzyme inhibitor; ARB, Angiotensin receptor blocker; ARNI, Angiotensin receptor-neprilysin inhibitors; BMI, body mass index; eGFR, estimated glomerular filtration rate; HF, heart failure; LVEF, left ventricular ejection fraction; MRA, mineralocorticoid receptor antagonist; NTproBNP, N-terminal pro B-type natriuretic peptide; NYHA, New York Heart Association; TIIDM, type 2 diabetes

**Supplementary Figure 4.** Chronic eGFR slope (day 60 to 720) according to initial change in eGFR (no decline, up to 10% decline and >10% decline) in the dapagliflozin [A] and placebo [B] groups.

**A**

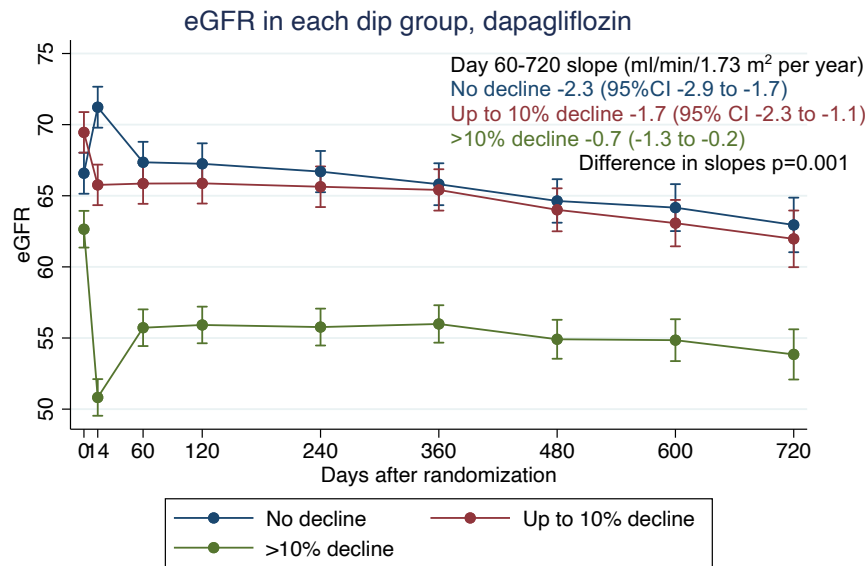

**B**

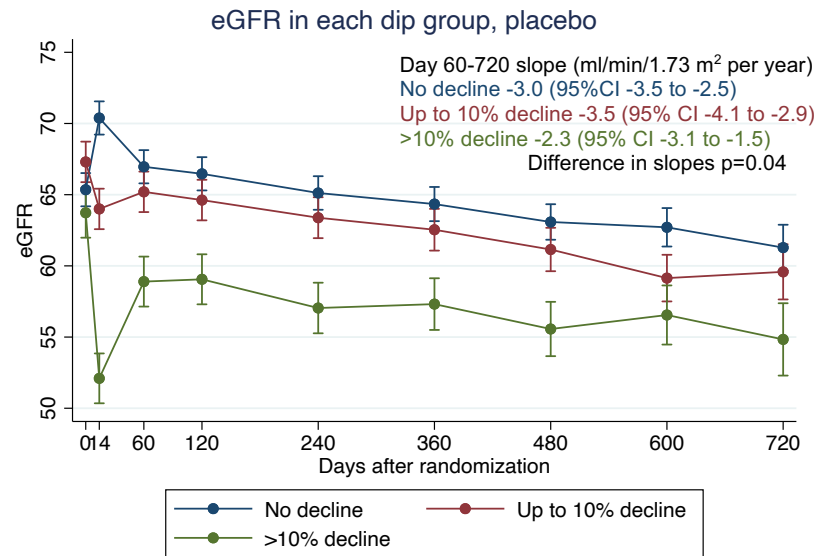

Supplement: cir-146-438-s001.pdf [file cir-146-438-s001.pdf]
